# Supplementary material for: Growth of preferential orientation of MIL-53(Al) film as nano-assembler
Source: Royal Society of Chemistry journal article supplement (doi:10.1039/c2ce25318f), 2012-01-01
Supplement: c2ce25318f.pdf [file c2ce25318f.pdf]

1

## Supporting Information

2

### Growth of Preferential Orientation of MIL-53(Al) Film as Nano-Assembler

3

Feng Zhang, Xiaoqin Zou, Fuxing Sun, Hao Ren, Yuan Jiang, and Guangshan Zhu\*

4

*State Key Laboratory of Inorganic Synthesis and Preparative Chemistry, College of Chemistry,*

5

*Jilin University, Changchun, China (130012),*

6

*E-mail: zhugs@jlu.edu.cn*

7

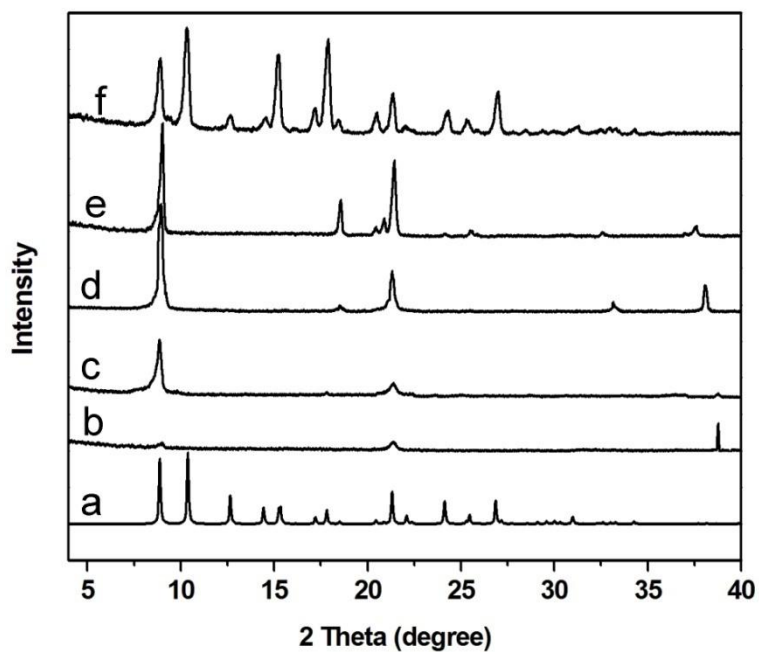

8

9 **Figure S1** X-ray diffraction patterns of (a) as-synthesized bulk powder MIL-53(Al), and

10 MIL-53(Al) films with the molar compositions of the reaction solution of

11  $\text{AlCl}_3 \cdot 6\text{H}_2\text{O} : x\text{H}_2\text{BDC} : 25\text{H}_2\text{O}$ : (b)  $x = 0.5$ , (c)  $x = 2.5$ , (d)  $x = 5$ , (e)  $x = 7.5$  and (f)  $x = 10$  heating

12 for 4 h at 200 °C.

13

14

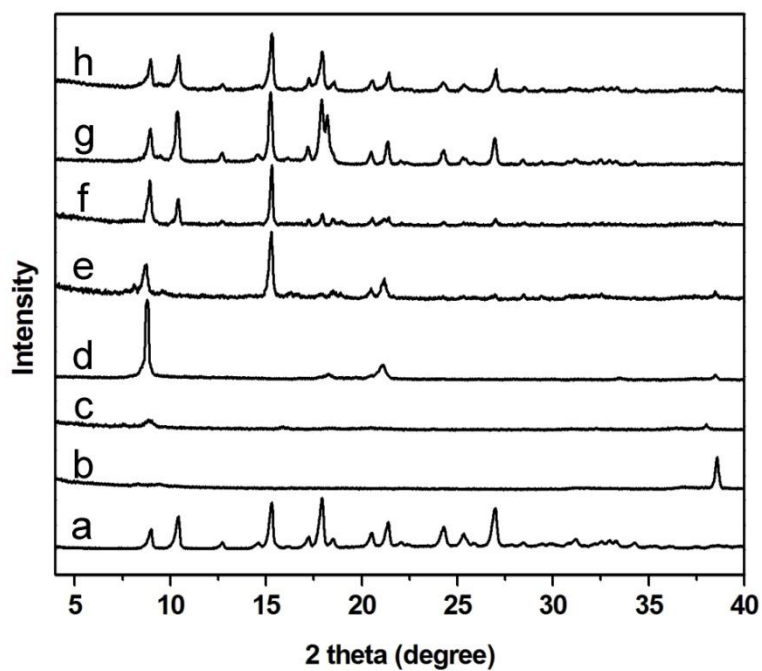

15

16

**Figure S2** X-ray diffraction patterns of (a) as-synthesized bulk powder MIL-53(Al), and

17

MIL-53(Al) films with the molar compositions of the reaction solution of

18

AlCl<sub>3</sub>·6H<sub>2</sub>O:5H<sub>2</sub>BDC:25H<sub>2</sub>O after hydrothermal treatment at 200°C for (b) 1 h, (c) 2 h, (d) 4 h, (e)

19

8 h, (f) 12 h, (g) 24 h and (h) 48 h.

20

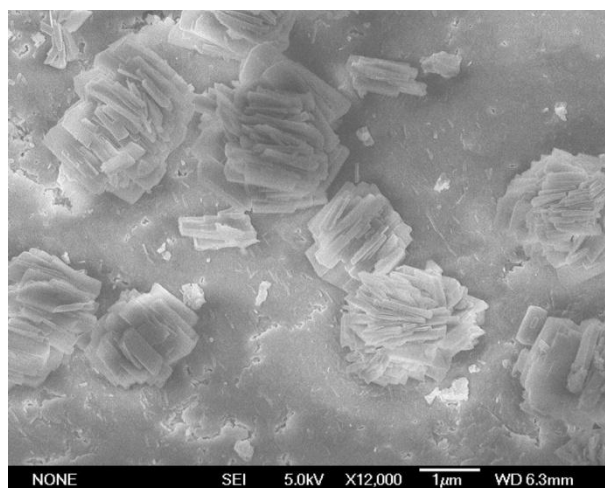

21

22 **Figure S3** SEM image of the MIL-53(Al) film formed on unactivated aluminium wafer with the  
23 molar composition of the reaction solution of  $\text{AlCl}_3 \cdot 6\text{H}_2\text{O} : 5\text{H}_2\text{BDC} : 25\text{H}_2\text{O}$  after hydrothermal  
24 treatment at  $200^\circ\text{C}$  for 4 h.

25

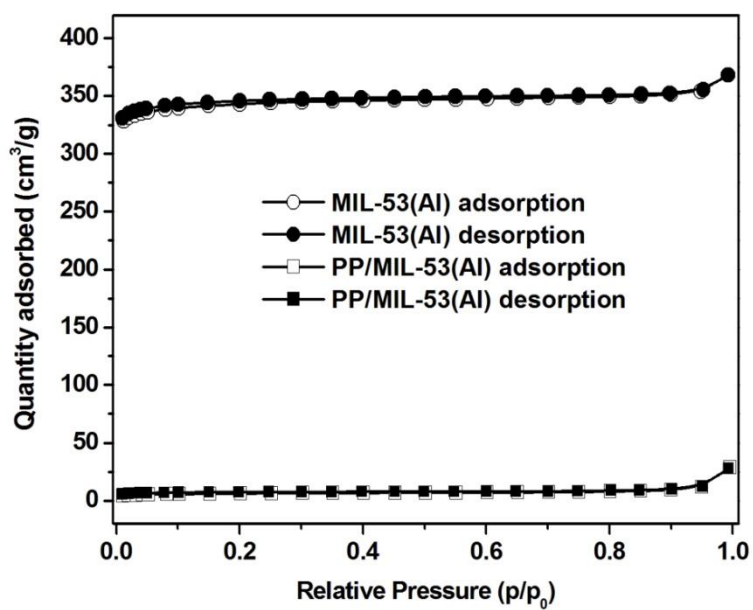

26

27 **Figure S4** Nitrogen absorption-desorption isotherms for MIL-53(Al) (top) and PP/MIL-53(Al)

28

(bottom) at 77 K.

29
